# Supplementary material for: Salivary biomarkers and cardiovascular disease: a systematic review
Source: publisher site journal article supplement (doi:10.1515/cclm-2017-1018), 2018-04-09
Supplement: Supplementary file 1 [file Appendix.docx]

**APPENDIX**

NEWCASTLE-OTTAWA QUALITY ASSESSMENT SCALE for CASE CONTROL STUDIES

Note: A study can be awarded a maximum of one star for each numbered item within the Selection and Exposure categories. A maximum of two stars can be given for Comparability.

**Selection**

***1)*** *Is the case definition adequate?*

a) yes, with independent validation ★
b) yes, e.g. record linkage or based on self reports

c) no description

***2)*** *Representativeness of the cases*

a) consecutive or obviously representative series of cases ★

b) potential for selection biases or not stated

***3)*** *Selection of Controls*

a) community controls ★

b) hospital controls
c) no description

***4)*** *Definition of Controls*

a) no history of disease (endpoint) ★

b) no description of source

**Comparability**

***1)*** *Comparability of cases and controls on the basis of the design or analysis*

a) study controls for _______________ (Select the most important factor.) ★
b) study controls for any additional factor ★

(This criteria could be modified to indicate specific control for a second important factor.)

**Exposure**

***1)*** *Ascertainment of exposure*

a) secure record (e.g. surgical records) ★
b) structured interview where blind to case/control status ★

c) interview not blinded to case/control status
d) written self report or medical record only
e) no description

***2)*** *Same method of ascertainment for cases and controls*

a) yes ★

b) no

***3)*** *Non-Response rate*

a) same rate for both groups ★
b) non respondents described
c) rate different and no designation

**Comprehensive list of search record titles, including those that were excluded from this review**

- An K, Salyer J, Brown RE, Kao HF, Starkweather A, Shim I. Salivary Biomarkers of Chronic Psychosocial Stress and CVD Risks: A Systematic Review. *Biol Res Nurs*. 2016;18(3):241-63.
- Nguyen TT, Ngo LQ, Promsudthi A, Surarit R. Salivary Lipid Peroxidation in Patients With Generalized Chronic Periodontitis and Acute Coronary Syndrome. *Clin Oral Investig.* 2016;87(2):134-41.
- Rathnayake N, Gustafsson A, Norhammar A, Kjellsromm B, Klinge B, Ryden L, et al. Salivary Matrix Metalloproteinase-8 and -9 and Myeloperoxidase in Relation to Coronary Heart and Periodontal Diseases: A Subgroup Report from the PAROKRANK Study (Periodontitis and Its Relation to Coronary Artery Disease). *PLoS One.* 2015;10(7):e0126370.
- Ghorbel IB, Feki NB, Salem TB, Hamzaoui A, Khanfir M, Lamloum M, et al. Microscopic Polyangiitis Associated with Primary Biliary Cirrhosis, Sjogren’s Syndrome and Hashimoto’s Thyroiditis. *Saudi J Kindey Transpl.* 2015;26(2):359-62.
- Zahn D, Petrak F, Franke L, Hagele AK, Juckel G, Lederbogen F, et al. Cortisol, Platelet Serotonin Content, and Platelet Activity in Patients with Major Depression and Type 2 Diabetes: An Exploratory Investigation. *Psychosom Med.* 2015;77(2):145-55.
- Millucci L, Ghezzi L, Bernardini G, Braconi D, Lupetti P, Perfetto F, et al. Diagnosis of Secondary Amyloidosis in Alkaptonuria. *Diagn Pathol.* 2014;9:185.
- Bryan NS. The Potential Use of Salivary Nitrite as a Marker of NO Status in Humans. *Nitric Oxide.* 2015;45:4-6.
- Purwar P, Khan MA, Mahdi AA, Pandey S, Singh B, Dixit J, et al. Salivary and Serum Leptin Concentrations in Patients with Chronic Periodontitis. *Periodontol.* 2015;86(4):588-94.
- Desai GS, Mathews ST. Saliva as a Non-Invasive Diagnostic Tool for Inflammation and Insulin-Resistance. *World J Diabetes.* 2014;5(6):730-38.
- Peterson JC, Charlson ME, Wells MT, Altemus M. Depression, coronary artery disease, and physical activity: how much exercise is enough? *Clin Ther.* 2014;36(11):1518-30.
- Lu L, Mackay DF, Newby DE, Pell JP. Association between salivary cotinine and cardiovascular biomarkers among nonsmokers and current smokers: cross-sectional study of 10,081 participants. 2014;48(6):703-10.
- Zheng H, Li R, Zhang J, Zhou S, Ma Q, Zhou Y, et al. Salivary biomarkers indicate obstructive sleep apnea patients with cardiovascular diseases. *Sci Rep.* 2014;4:7046.
- Marrelli M, Gentile S, Palmieri F, Paduano F, Tatullo M. Correlation between Surgeon's experience, surgery complexity and the alteration of stress related physiological parameters. *PLoS One*. 2014;9(11):e112444.
- Kosaka T, Kokubo Y, Ono T, Sekine S, Kida M, Kikui M, et al. Salivary inflammatory cytokines may be novel markers of carotid atherosclerosis in a Japanese general population: the Suita study. *Elsevier.* 2014;237(1):128-8.
- Martikainen S, Pesonen A, Lahti J, Heinonen K, Pyhala R, Tammelin T, et al. Physical activity and hypothalamic-pituitary-adrenocortical axis function in adolescents. *Elsevier.* 2014;49:96-105.
- Miller CS, Foley JD, 3rd, Floriano PN, Christodoulides N, Ebersole JL, Campbell CL *et al*. Utility of salivary biomarkers for demonstrating acute myocardial infarction*. J dent res.* 2014;93(7 Suppl):72s-79s.
- Schafer CA, Schafer JJ, Yakob M, Lima P, Camargo P, Wong DT. Saliva diagnostics: utilizing oral fluids to determine health status. *Monogr Oral Sci.* 2014;24:88-98.
- Haswell LE, Papadopoulou E, Newland N, Shepperd CJ, Lowe FJ. A cross-sectional analysis of candidate biomarkers of biological effect in smokers, never-smokers and ex-smokers. *Biomarkers.* 2014;19(5):356-67.
- Aydin S, Aydin S, Kobat MA, Kalayci M, Eren MN, Yilmaz M, et al. Decreased saliva/serum irisin concentrations in the acute myocardial infarction promising for being a new candidate biomarker for diagnosis of this pathology. *Peptides.* 2014;56:141-5.
- Narotzki B, Reznick AZ, Mitki T, Aizenbud D, Levy Y. Enhanced cardiovascular risk and altered oxidative status in elders with moderate excessive body fat. *Rejuvenation res.* 2014;14(4):334-40.
- Choi B, Schnall PL, Dobson M, Garcia-Rivas J, Kim H, Zaldivar F, et al. Very Long (> 48 hours) Shifts and Cardiovascular Strain in Firefighters: a Theoretical Framework. *Ann Occup Environ Med*. 2014;26:5.
- Yin X, Subramanian S, Hwang SJ, O’Donnell CJ, Fox CS, Courchesne P, et al. Protein biomarkers of new-onset cardiovascular disease: prospective study from the systems approach to biomarker research in cardiovascular disease initiative. *Arterioscler Thromb Vasc Biol.* 2014;34(4)939-45.
- Mirzaii-Dizgah I, Riahi E. Salivary troponin I as an indicator of myocardial infarction. *Indian J Med Res.* 2013;138(6):861-65.
- Salminen A, Gursoy UK, Paju S, Hyvarinen K, Mantyla P, Buhlin K, et al. Salivary biomarkers of bacterial burden, inflammatory response, and tissue destruction in periodontitis. *J Clin Periodontol*. 2014;41(5):442-50.
- Bagan J, Saez GT, Tormos MC, Gavalda-Esteve C, Bagan L, Leopoldo-Rodado M, et al. Oxidative stress in bisphosphonate-related osteonecrosis of the jaws. *J Oral Pathol Med.* 2014;43(5):371-77.
- Labat C, Temmar M, Nagy E, Bean K, Brink C, Benetos A, et al. Inflammatory mediators in saliva associated with arterial stiffness and subclinical atherosclerosis. *J Hypertens.* 2013;31(11):2251-8.
- Sosnoff DR, Friend RB, Berkovic M, Rasansky RJ, Hoffman SM. Salivary amylase-producing multiple myeloma: case report and review of the current literature. *J Clin Oncol*. 2013;31(19):e309-11.
- Nahleili O. Wegener's granulomatosis and the salivary glands. *Isr Med Assoc J.* 2013;15(3):178-9.
- Han DH, Kim MS, Shin HS, Park KP, Kim HD. Association between periodontitis and salivary nitric oxide metabolites among community elderly Koreans. *J Periodontol.* 2013;84(6):776-784.
- Kulza M, Wozniak A, Senczuk-Przybylowska M, Czarnywojtek A, Kurhanska-Flisykowska A, Florek E. Saliva cotinine determination using high-performance liquid chromatography with diode - array detection. *Przegl Lek.* 2012;69(10):837-40.
- Toker A, Aribas A, yerlikaya FH, Tasyurek E, Akbuga K. Serum and saliva levels of ischemia-modified albumin in patients with acute myocardial infarction. *J Clin Lab Anal.* 2013;27(2):99-104.
- Michiue T, Ishikawa T, Kawamoto O, Chen JH, Wang Q, Zhu BL, et al. Postmortem serum levels of amylase and gamma glutamyl transferase (GGT) as markers of systemictissue damage in forensic autopsy. *Leg Med (Tokyo).* 2013;15(2):79-84.
- Naidoo T, Konkol K, Mckune AJ, Biccard B, Dubose K. Elevated salivary C-reactive protein predicted by low cardio-respiratory fitness and being overweight in African children. *Cardiovasc J Afr.* 2012;23(9):501-6.
- Skalova A, Altermani A, Di Palma S, Simpson RH, Hosticka L, Andrle P, et al. Pleomorphic adenoma of the salivary glands with intravascular tumor deposits: a diagnostic pitfall. *Am J Surg Pathol.* 2012;36(11):1674-82.
- de Kock A, Malan L, Hamer M, Malan NT. Defensive coping and subclinical vascular disease risk - associations with autonomic exhaustion in Africans and Caucasians: the SABPA study. *Atherosclerosis.* 2012;225:438-43.
- Foley JD 3rd, Sneed JD, Steinhubl SR, Kolasa JR, Ebersole JL, Lin Y *et al*. Salivary biomarkers associated with myocardial necrosis: Results from an alcohol septal ablation model. *Oral surg, oral med, oral pathol and oral radiol.* 2012;114(5):616-623.
- DiSilvestro RA, Joseph E, Zhao S, Bomser J. Diverse effects of a low dose supplement of lipidated curcumin in healthy middle aged people. *Nutr J.* 2012;11:79.
- Martini D, Baldini C, Latorre M, Giorgerini V, Sernissi F, Della Rossa A, et al. Future prospects for salivary proteomics in rheumatology: the example of eosinophil granulomatosis with polyangiitis. *Clin Exp Rheumatol.* 2012;30(5):810-11.
- Vomaske J, Denton M, Kreklywich C, Andoh T, Osborn JM, Chen D, et al. Cytomegalovirus CC chemokine promotes immune cell migration. *J Virol.* 2012;86(21):11833-44.
- Wong DT. Salivary Diagnostics. *Oper Dent.* 2012;37(6):562-70.
- Foley JD 3rd, Sneed JD, Steinhubl SR, Kolasa J, Ebersole JL, Lin Y, et al. Oral fluids that detect cardiovascular disease biomarkers. *Oral Surg Oral Med Oral Pathol Oral Radiol.* 2012;114(2):207-14.
- Wong IS, Ostry AS, Demers PA, Davies HW. Job strain and shift work influences on biomarkers and subclinical heart disease indicators: a pilot study. *J Occup Environ Hyg*. 2012;9(8):467-77.
- Kwok R. Dental science: Oral observatory. *Nature.* 2012;486(7401):147-8.
- Barrett AW.Wegener's granulomatosis of the major salivary glands. *J Oral Pathol Med.* 2012;41(10):721-7.
- Wong DD, Pllai SR, Kumarasinghe MP, McGettigan B, Thin LW, Segarajasingam DS, et al. IgG4-related sclerosing disease of the small bowel presenting as necrotizing mesenteric arteritis and a solitary jejunal ulcer. *Am J Surg Pathol.* 2012;36(6):929-34.
- Bondonno CP, Croft KD, Puddey IB, Considine MJ, Yang X, Ward NC, et al. Nitrate causes a dose-dependent augmentation of nitric oxide status in healthy women. *Food Funct.* 2012;3(5):522-7.
- Out D, Hall RJ, Granger DA, Page GG, Woods SJ. Assessing salivary C-reactive protein: longitudinal associations with systemic inflammation and cardiovascular disease risk in women exposed to intimate partner violence. *Brain Behav Immun.* 2012;26(4):543-51.
- Park J, Sunkara V, Kim TH, Hwang H, Cho Yk. Lab-on-a-disc for fully integrated multiplex immunoassays. *Anal Chem.* 2012;84(5):2133-40.
- DeSantis AS, DiezRoux AV, Hajat A, Aiello AE, Golden SH, Jenny NS, et al. Associations of salivary cortisol levels with inflammatory markers: the Multi-Ethnic Study of Atherosclerosis. *Psychoneuroendocrinology.* 2012;37(7):1009-18.
- Mumcu G, Cimilli H, Karacayli U, Inanc N, Ture-Ozdemir F, Eksioglu-Demiralp E, et al. Salivary levels of antimicrobial peptides Hnp 1-3, Ll-37 and S100 in Behcet's disease. *Arch Oral Biol.* 2012;57(6):642-6.
- Covelli MM, Wood CE, Yarandi HN. Biologic measures as epidemiological indicators of risk for the development of hypertension in an African American adolescent population. *J Cardiovasc Nurs.* 2012;27(6):476-84.
- Shen YS, Chen WL, Chang HY, Kuo HY, Chang YC, Chu H.. Diagnostic performance of initial salivary alpha-amylase activity for acute myocardial infarction in patients with acute chest pain. *J emerg med*. 2012;43(4):553-560.
- Gump BB, MacKenzie JA, Dumas AK, Palmer CD, Parsons PJ, Segu ZM, et al. Fish consumption, low-level mercury, lipids, and inflammatory markers in children. *Environ Res.* 2012;112:204-211.
- Luptáková L, Sivakova D, Sramekova D, Cvicelova M. The association of cytochrome P450 1B1 Leu432Val polymorphism with biological markers of health and menopausal symptoms in Slovak midlife women. *Menopause.* 2012;19(2):216-24.
- Seldenrijk A, Hamer M, Lahiri A, Penninx BW, Steptoe A. Psychological distress, cortisol stress response and subclinical coronary calcification. *Psychoneuroendorinology.* 2012;37(1):48-55.
- Santana HA, Moreira SR, Neto WB, Silva CB, Sales MM, Oliveira VN, et al. The higher exercise intensity and the presence of allele I of ACE gene elicit a higher post-exercise bloodpressure reduction and nitric oxide release in elderly women: an experimental study. *BMC Cardiovasc Disord.* 2011;11:71.
- Giannobile WV, McDevitt, Niedbala RS, Malamud D. Translational and clinical applications of salivary diagnostics. *Adv Dent Res.* 2011;23(4):375-380.
- Mirzaii-Dizgah I, Riahi E. Serum and saliva levels of cathepsin L in patients with acute coronary syndrome. *J Contemp Dent Prac.* 2011;12(2):114-119.
- Bader HI. Salivary diagnostics in medicine and dentistry: a review. *Dentistry Today.* 2011;140.
- Bagavant H, Scindia Y, Nackiewicz D, Nandula SR, Doran A, Cutchins A, et al. Deficiency of a transcriptional regulator, inhibitor of differentiation 3, induces glomerulonephritis in apolipoprotein E-deficient mice: a model linking hyperlipidemia and renal disease. *Am J Pathol.* 2011;179(2):651-660.
- Mirzaii-Dizgah I, Hejazi SF, Riahi E, Salehi MM. Saliva-based creatine kinase mb measurement as a potential point-of-care testing for detection of myocardial infarction. *Clin oral investig*. 2012;16(3):775-779.
- Carev M, Karanovic N, Bagatin J, Matulic NB, Pcotic R, Valic M, et al. Blood pressure dipping and salivary cortisol as markers of fatigue and sleep deprivation in staff anesthesiologists. *Coll Antropol.* 2011;35(1):133-8.
- Mirzaii-Dizgah I, Jafari-Sabet M. Unstimulated whole saliva creatine phosphokinase in acute myocardial infarction. *Oral dis*. 2011;17(6):597-600.
- Shen YS, Chan Cm, Chen WL, Chen JH, Chang HY, Chu H. Initial salivary α-amylase activity predicts malignant ventricular arrhythmias and short-term prognosis after ST-segment elevation myocardial infarction. *Emerg Med J.* 2011;28(12):1041-45.
- Do DP, Diez Roux AV, Hajat A, Auchincloss AH, Merkin SS, Ranjit N, et al. Circadian rhythm of cortisol and neighborhood characteristics in a population-based sample: the Multi-Ethnic Study of Atherosclerosis. *Health Place.* 2011;17(2):625-32.
- Juster RD, Sindi S, Marin MF, Perna A, Hashemi A, Pruessner JC, et al. A clinical allostatic load index is associated with burnout symptoms and hypocortisolemic profilesin healty workers. *Psychoneuroendocrinology.* 2011:36(6):797-805.
- Budnelli A, Mantyla P, Emingil G, Tervahartiala T, Pussinen P, Baris N, et al. Acute myocardial infarction is reflected in salivary matrix metalloproteinase-8 activation level. *J Periodontol.* 2011;82(5):716-725.
- Tran SD, Redman RS, Barrett AJ, Pavletic SZ, Key S, Liu Y, et al. Microchimerism in salivary glands after blood- and marrow-derived stem cell transplantation.  *Biol Blood Marrow Transplant.* 2011;17(3):429-433.
- Moresco L, Bellissima V, Colivicchi M, Crivelli S, Guerriero F, Ricotti A, et al. [Markers of brain injury in non-invasive biological fluids]. *Minerva Pediatr.* 2010;62(3):141-3.
- Keane C, Petersen H, Reynolds K, Newman DK, Cox D, Newman PJ, et al. Mechanism of outside-in {alpha}IIb{beta}3-mediated activation of human platelets by the colonizing Bacterium, Streptococcus gordonii. *Arterioscler Thromb Vasc Biol.* 2010;30(12):2408-15.
- Innes AL, McGrath KW, Dougherty RH, McCulloch CE, Woodruff PG, Seibold MA, et al. The H antigen at epithelial surfaces is associated with susceptibility to asthma exacerbation. *Am J Respir Crit Care Med.* 2011;183(2):189-94.
- Yamamoto M, Takahashi H, Suzuki C, Tabeya T, Ohara M, Naishiro Y, et al. Analysis of serum IgG subclasses in Churg-Strauss syndrome – the meaning of elevated serum levels of IgG4. *Intern Med.* 2010;49(14):1365-70.
- Hamer M, Stamatakis E, Kivimaki M, Lowe GD, Batty GD. Objectively measured secondhand smoke exposure and risk of cardiovascular disease: what is the mediating role of inflammatory and hemostatic factors? *J Am Coll Cardiol.* 2010; 56(1):18-23.
- Eggers KM, Kempf T, Venge P, Walletin L, Wollert KC, Lindahl B. Improving long-term risk prediction in patients with acute chest pain: the Global Registry of Acute Coronary Events (GRACE) risk score is enhanced by selected nonnecrosis biomarkers. *Am Heart J.* 2010;160(1):88-94.
- Nakamura M, Kawakami A, Hayashi T, Iwamoto N, Okada A, Tamai M, et al. Anti-centromere antibody seropositive Sjögren's syndrome differs from conventional subgroup in clinical and pathological study. *BMC Musculoskelet Disord.* 2010;11:140.
- Deepa T, Thirrunavukkarasu N.Saliva as a potential doagnostic tool. *Indian J Med Sci.* 2010;64(7):293-306.
- Heim C, Abele-Ohl S, Eckl S, Ramsperger-Gleixner M, Mahmoudian S, Weyand M, et al. Murine cytomegalovirus infection leads to increased levels of transplant arteriosclerosis in a murine aortic allograft model*. Transplantation.* 2010;90(4):373-9.
- Miller CS, Foley JD, Bailey AL, Campell CL, Humphries RL, Christodoulides N, et al. Current developments in salivary diagnostics. *Biomark Med.* 2010; 4(1):171-89.
- Sugimoto M, Wong DT, Hirayama A, Soga T, Tomita M. Capillary electrophoresis mass spectrometry-based saliva metabolomics identified oral, breast and pancreatic cancer-specific profiles. *Metabolomics.* 2010;6(1):78-95.
- Kawada T, Hirata K, Inagaki H, Otsuka T, Katsumata M. Significance of the 100-point scale to evaluate perceived tobacco dependence*. Work.* 2010;35(2):183-9.
- Marques AH, Silverman MN, Sternberg EM. Evaluation of stress systems by applying noninvasive methodologies: measurements of neuroimmune biomarkers in the sweat, heart rate variability and salivary cortisol. *Neuroimmunomodulation.* 2010;17(3):205-8.
- Al-Rawi NH, Atiya KM. Salivary neuron specific enolase: an indicator for neuronal damage in patients with ischemic stroke and stroke-prone patients. *Clin Chem Lab Med.* 2009;47(12):1519-24.
- Sarndahl E, Bergstrom I, Njim J, Forslund T, Peretti M, Jonasson L. Enhanced neutrophil expression of annexin-1 in coronary artery disease. *Metabolism.* 2010;59(3):433-40.
- Pink R, Simek J, Vondrakova J, Faber E, Michl P, Pazdera J, et al. Saliva as a diagnostic medium. *Biomed Pap Med Fac Univ Palacky Olomuoc Czech Repub.* 2009;153(2):103-10.
- Didilescu AC, Hanganu SC, Galie N, Greabu M, Totan A, Stratul SI, et al. [The role of smoking in changing essential parameters in body homeostasis].  *Pneumologia.* 2009;58(2):89-94.
- Mikolaenko I, Listinsky CM. Systemic CD5+ MALT lymphoma: presentation with Waldenstrom syndrome.  *Ann Diagn Pathol.* 2009;13(4):272-7.
- Floriano PN, Christodoulides N, Miller CS, Ebersole JL, Spertus J, Rose BG, et al. Use of saliva-based nano-biochip tests for acute myocardial infarction at the point of care: a feasibility study.  *Clin Chem.* 2009;55(8):1530-8.
- Vreeburg SA, Kruijtzer BP, van Pelt Dyck R, DeRijk RH, Hoogendijk WJ, Smit JH, et al. Associations between sociodemographic, sampling and health factors and various salivary cortisol indicators in a large sample without psychopathology. *Psychoneuroendocrinology.* 2009;34(8):1109-20.
- Ramseier CA, Kinney JS, Herr AE, Braun T, Sugai JV, Shelburne CA, et al. Identification of pathogen and host-response markers correlated with periodontal disease. *J Periodontol.* 2009;80(3):436-46.
- Zidverc-Trajkovic J, Stanimirovic D, Obrenovic R, Tajti J, Vecsei L, Gardi J, et al. Calcitonin gene-related peptide levels in saliva of patients with burning mouth syndrome. *J Oral Pathol Med.* 2009;38(1):29-33.
- Sakihara S. [Current diagnosis of secondary hypertension associated with the endocrinopathies]. *Rinsho Byori.* 2008;56(12):1112-7.
- Buchanan L, Likness S. Evidence-based practice to assist women in hospital settings to quit smoking and reduce cardiovascular disease risk. *J Cardiovasc Nurs.* 2008;23(5):397-406.
- Bovenzi M, D’Agostin F, Rui F, Ambrosi L, Zefferino R. Salivary endothelin and vascular disorders in vibration-exposed workers. *Scand J Work Environ Health.* 2008;34(2):133-41.
- Torres SJ, Nowson CA, Worsley A. Dietary electrolytes are related to mood. *Br J Nutr.* 2008;100(5);1038-45.
- Qvarnstrom M, Janket S, Jones JA, Nuutinen P, Baird AE, Nunn ME, et al. Salivary lysozyme and prevalent hypertension. *J Dent Res.* 2008;87(5):480-4.
- Palihke A, Lokki ML, Pussinen PJ, Paju S, Ahlberg J, Asikainen S, et al. Lymphotoxin alpha LTA+496C allele is a risk factor for periodontitis in patients with coronary artery disease. *Tissue Antigens*. 2008;71(6):530-7.
- Schmitz KJ, Baumgaertel MW, Schmidt C, Sheu SY, Betzler M, Schmid KW.Wegener's granulomatosis in the thyroid mimicking a tumour. *Virchows Arch.* 2008;452(5):571-4
- Covelli MM, Wood CE, Yarandi HN. The association of low birth weight and physiological risk factors of hypertension in African American adolescents. *J Cardiovasc Nurs.* 2007;22(6):440-7.
- Schell E, Theorelli T, Hasson D, Arnetz B, Sraste H. Stress biomarkers' associations to pain in the neck, shoulder and back in healthy media workers: 12-month prospective follow-up. *Eur Spine J.* 2008;17(3):393-405.
- Schaffer L, Burkhardt T, Muller-Vizentini D, Rauh M, Tomaske MMieth RA, et al. Cardiac autonomic balance in small-for-gestational-age neonates. *Am J Physiol Heart Circ Physiol.* 2008;294(2):H884-90.
- Seriakov AP, Ivanov IuV, Kochurova EV, Kozlov SV, Feofanov SV. [Diagnostics, treatment and preventive maintenance of tromb complications at onkostomatologic pa-tients at chemistry-therapy and operative intervention]. *Voenno-meditsinskii Zhurnal.* 2007;328(6):50-52.
- Nowak-Banasik L, Sein Anand Jm Chodorowski Z, Wiergowski M, Sobiczewski W. [An assessment of cigarette smoking, with the usage of cotinine level, on life satisfaction in patients with coronary heart disease]. *Przegl Lek.*2007;64(4-5):260-2.
- Boston PF, Gopalkaje K, Manning L, Middleton L, Loxley M. Developing a simple laboratory test for Alzheimer's disease: measuring acetylcholinesterase in saliva - a pilot study. *Int J geriatr Psychiatry.* 2008;23(4):439-40.
- Laures-Gore J, Heim CM, Hsu YS. Assessing cortisol reactivity to a linguistic task as a marker of stress in individuals with left-hemisphere stroke and aphasia. *J Speech Lang hear Res.* 2007;50(2);493-507.
- Gau V, Wong D. Oral fluid nanosensor test (OFNASET) with advanced electrochemical-based molecular analysis platform. *Ann N Y Acad Sci.* 2007;1098:401-10.
- Glick M. Molecular and protein markers of disease.  *Ann N Y Acad Sci.* 2007;1098:267-8.
- *Analysis of gingival crevicular fluid as applied to the diagnosis of oral and systemic diseases*

Lamster IB, et al. (2007)

- Toda M, Tsukinoki R, Morimoto K. Measurement of salivary adiponectin levels. *Acta Diabetol.* 2007;44(1):20-2.
- Ubara Y, Tagami T, Suwabe T, Sogawa Y, Hoshino J, Higa Y, et al. Systemic AA-amyloidosis related to MPO-ANCA microscopic polyangiitis: a case report. *Amyloid.* 2006;13(3):178-83.
- Mason A, Wallace AM, Macityre H, Teoh YP, Bath LE, Critchley HO, et al. Undetectable salivary testosterone in young women with premature ovarian failure. *Clin Endocrinol (Oxf).* 2006;64(6):711-4.
- Hirasaki S, Ymazaki T, Shiba K. Changes in salivary components by drug administration in patients with heart diseases. *J Med Dent Sci.* 2005;52(4):183-8.
- Goules A, Tzioufas AG, Manousakis MN, Kirou KA, Crow MK, Routsias JG. Elevated levels of soluble CD40 ligand (sCD40L) in serum of patients with systemic autoimmune diseases. *J Autoimmun.* 2006;26(3):165-71.
- Ryff CD, Dienberg Love G, Urry HL, Muller D, Rosenkrans MA, Friedman EM, et al. Psychological well-being and ill-being: do they have distinct or mirrored biological correlates?. *Psycohther psychosom.* 2006;75(2):85-95.
- Janket SJ, Meurman JH, Nuutinen P, Qvarnstrom M, Nunn ME, Baird AE, et al. Salivary lysozyme and prevalent coronary heart disease: possible effects of oral health on endothelial dysfunction. *Arterioscler thromb vasc biol.* 2006;26(2);433-4.
- Violanti JM, Burchfiel CM, Miller DB, Andrew ME, Dorn J, Wactawski-Wende J, et al. The Buffalo Cardio-Metabolic Occupational Police Stress (BCOPS) pilot study: methods and participant characteristics. *Ann Epidemiol.* 2006;16(2):148-56.
- Jones GL, Lukaris AD, Prabhu HV, Brown MJ, Bondeson J. Wegener's granulomatosis mimicking a parotid abscess. *J Laryngol Otol.* 2005;119(9):746-9.
- Turkcaper L, Sak SD, Saatci M, Duman M, Olmez U. Vasculitis and expression of vascular cell adhesion molecule-1, intercellular adhesion molecule-1, and E-selectin in salivary glands of patients with Sjögren's syndrome.  *J Rheumatol.* 2005;32(6):1063-70.
- Eller NH, Netterstrom B, Allerup P. Progression in intima media thickness--the significance of hormonal biomarkers of chronic stress. *Psychoneuroendocrinology.* 2005;30(8):715-23.
- Von Kanel R, Kudielka BM, Hanebuth D, Preckel D, Fischer JE. Different contribution of interleukin-6 and cortisol activity to total plasma fibrin concentration and to acute mental stress-induced fibrin formation. *Clin Sci (Lond).* 2005;109(1):61-7.
- Jekell A, Hossain A, Alehagen U, Dahlstrom U, Rosen A. Elevated circulating levels of thioredoxin and stress in chronic heart failure. *Eur J Heart Fail.* 2004;6(7):883-90.
- Dong N, Da Cunha V, Citkowicz A, Wu F, Vincelette J, Larsen B, et al. P-selectin-targeting of the fibrin selective thrombolytic Desmodus rotundus salivary plasminogen activator alpha1. *Thromb Haemost.* 2004;92(5):956-65.
- Vasil’ev VI, Probatova NA, Varlamova Elu, Tupitsin NN, Simonova MV, Sofanova TN, et al. [Prognostic implications of mixed monoclonal cryoglobulinemia in Sjogren's disease]. *Ter Arkh.* 2004;76(8):61-8.
- Chegar BE, Kelley RT. Wegener's granulomatosis presenting as unilateral parotid enlargement. *Laryngoscope.* 2004;114(10):1730-3.
- Ahmed N, de la Torre B, Wahlgren NG. Salivary cortisol, a biological marker of stress, is positively associated with 24-hour systolic blood pressure in patients with acute ischaemic stroke. *Cerebrovasc Dis.* 2004;18(3):206-13.
- Xiang S, Denver R, Bailey M, Krum H. Physiologic determinants of endothelin concentrations in human saliva. *Clin Chem.* 2003;49(12):2012-9.
- Rosmond R, Wallerius S, Wanger P, Martin L, Holm G, Bjorntorp B. A 5-year follow-up study of disease incidence in men with an abnormal hormone pattern. *J Intern Med.* 2003;254(4):386-90.
- Streckfus CS, Bigler LR. Saliva as a diagnostic fluid. *Oral Dis.* 2002;8(2):69-76.
- Crean SJ, Adams R, Bennett J. Sublingual gland involvement in systemic Wegener's granulomatosis: a case report. *Int J Oral Maxillofac Surg.* 2002;31(1):104-6.
- Valdez R, Finn WG, Ross CW, Singleton TP, Tworek JA, Schnitzer B. Waldenström macroglobulinemia caused by extranodal marginal zone B-cell lymphoma: a report of six cases. *Am J Clin Pathol.* 2001;116(5):683-90.
- Berge S, Niederhagen B, von Lindern JJ. Appel T, Reich RH. Salivary gland involvement as an initial presentation of Wegener's disease. A case report. *Int J Oral Maxillofac Surg.* 2000;29(6):450-2.
- Adam DJ, Milne AA, Evans SM, Roulston JE, Lee AJ, Ruckley CV, et al. Serum amylase isoenzymes in patients undergoing operation for ruptured and non-ruptured abdominal aortic aneurysm. *J Vasc Surg.* 1999;30(2):229-35.
- Cacoub P, Poynard T, Ghillani P, Charlotte F, Olivi M, Piette JC, et al. [Extrahepatic manifestations of chronic hepatitis C]. *Arthritis Rheumatol.* 1999;42(10):2204-12.
- Lie JT. Wegener's granulomatosis: histological documentation of common and uncommon manifestations in 216 patients. *Vasa.* 1997;26(4):261-70.
- Schett G, Metzler B, Kleindienst R, Moschen I, Hattmannsdorfer R, Wolf H, et al. Salivary anti-hsp65 antibodies as a diagnostic marker for gingivitis and a possible link to atherosclerosis.  *Int Arch Allergy Immunol.* 1997;114(3):246-50.
- Bullard DC, King PD, Hicks MJ, Dupont B, Beaudet AL, Elkon KB. Intercellular adhesion molecule-1 deficiency protects MRL/MpJ-Fas(lpr) mice from early lethality. *J Immunol.* 1997;159(4):2058-67.
- De Vita S, Sacco C, Sansonno D, Gloghini A, Dammacco F, Crovatto M, et al. Characterization of overt B-cell lymphomas in patients with hepatitis C virus infection. *Blood.* 1997;90(2):776-82.
- Singh S, Kaura D, Kumari S, Gupta D, Dey P, Suri S. Wegener's presenting as submandibular swelling. *Sarcoidosis Vasc Diffuse Lung Dis.* 1997;14(1):81-2.
- Shilkina NP, Baranov AA, Varshavskaia AA, Makarushin AA, Nasono EL, Panchenko KI, et al. [Clinical significance of Willebrand's factor antigen in patients with primary Sjogren's syndrome]. *Ter Arckh.* 1997;69(12):15-8.
- Hebbar M, Gillot JM, Hachulla E, Lassalle P, Hatron PY, Devulder B, et al. Early expression of E-selectin, tumor necrosis factor alpha, and mast cell infiltration in the salivary glands of patients with systemic sclerosis. *Arthritis Rheum.* 1996;39(7):1161-5.
- Lustmann J, Segal N, Markitziu A. Salivary gland involvement in Wegener's granulomatosis. A case report and review of the literature. *Oral Surg Oral Med Oral Pathol.* 1994;77(3):254-9.
- Schaffer LW, Davidson JR, Siegl PK, Gould RJ, Nutt RF, Brady SF, et al. -Recombinant leech antiplatelet protein prevents collagen-mediated platelet aggregation but not collagen graft thrombosis in baboons. *Arterioscler Thromb.* 1993;13(11):1593-601.
- Filpo RM, Cardon T, FouletA, Hachulla E, Duquesnoy B, Delcambre B, et al. [Is the expression of TNF-alpha and cell adhesion molecules a marker of development of rheumatoid vasculitis?]. *Rev Med Interne.* 1993;14(10):1018
- Bottinger EP, Niles JL, Collins AB, McCluskey RT, Arnaout, MA. Antineutrophil cytoplasmic autoantibody-associated vasculitis presenting as Sjögren's syndrome. *Arthritis Rheum.* 1992;35(11):1373-6.
- Schwartzman JS, Sole D, Naspitz CK. Ataxia-telangiectasia: a clinical and laboratory review study of 14 cases. *Allergol Immunopathol (Madr).* 1990;18(2):105-11.

Ohtsuki T, Yawata Y, Wada H, Sugihara T, Mori M, Namba M. Two human myeloma cell lines, amylase-producing KMS-12-PE and amylase-non-producing KMS-12-BM, were established from a patient, having the same chromosome marker, t(11;14)(q13;q32). *Br J Haematol.* 1989;73(2):199-204.

- Slavchev S, Tsoneva M, Zakhariev Z. [The secretory type of persons who have survived a myocardial infarct]. *Vutr Boles.* 1989;28(2):31-4.
- Pinkus GS, Kurtin PJ. Epithelial membrane antigen--a diagnostic discriminant in surgical pathology: immunohistochemical profile in epithelial, mesenchymal, and hematopoietic neoplasms using paraffin sections and monoclonal antibodies. *Hum Pathol.* 1989;16(9):929-40.
- Seto S, Rabito SF, Scicli AG, Carretero OA. Lack of evidence for the participation of tonin in the pathogenesis of one-kidney, one-clip renovascular hypertension. *Circ Res.* 1984;55(5):580-4.
- Chapelon C, Uzzan B, Piette JC, Jacques C, coche E, Godeau P. [Sarcoidosis in internal medicine. A cooperative study of 554 cases]. *Ann Med Interne (Paris)*. 1984;135(2):125-31.
- Rockel A, Heidland A. Kallikrein-kinin system and hypertension1. *Contr Nephrol.* 1980;23:105-24.
- Garcia R, Boucher R, Gutkowska J, Kondo K, Demassieux S, Genest J. Effect of antitonin on blood pressure in the one-kidney hypertensive rat. *Clin Sci Mol Med.* 1978;54(4):457-61.
- Joseph JC, Baker C, Sprang ML, Bermes EW. Changes in plasma proteins during pregnancy. *Ann Clin Lab Sci.* 1978;8(2):130-41.

**WEB OF SCIENCE**

- Juntunen E, Arppe R, Kalliomaki L, Slminen T, Talha SM, Myyrylainen T, et al. Effects of blood sample anticoagulants on lateral flow assays using luminescent photon-upconverting and Eu(III) nanoparticle reporters. *Anal Biochem.* 2016;492(1):13-20.
- Patacchioli FR, Ghiciuc CM, Bernardi M, Dima-Cozma LC, Fattorini L, Squeo MR, et al. Salivary alpha-amylase and cortisol after exercise in menopause: influence of long-term HRT. *Climacteric.* 2015;18(4):528-35.
- Slavish DC, Graham-Engelad JE, Smyth JM, Engeland CG. Salivary markers of inflammation in response to acute stress. *Brain Behav Immun.* 2015;44:253-69.
- Tsigos C, Stefanaki C, Lambrou GI, Bosciero D, Chrousos D, Chrousos GP. Stress and inflammatory biomarkers and symptoms are associated with bioimpedance measures. *Eur J Clin Invest.* 2015;45(2):126-34.
- Khalighi HR, Mortazavi H, Alipour S, Nadizadeh K. Relationship Between Salivary and Plasma Level of Homocysteine in Coronary Artery Disease. *Dent Med Probl.* 2015;52(1):22-25.
- Beskaravainy PM, Molchanov MV, Suslikov AV, Paskevich SI, Kutyshenko VP, Vorob’ev SI. [NMR study of human biological fluids for detection of pathologies]. *Biomed Khim.* 2015;61(1):141-9.
- Narayanan R. Phenome-genome association studies of pancreatic cancer: new targets for therapy and diagnosis. *Cancer Genomics Proteomics.* 2015;12(1):9-19.
- Fuentes L, Yakob M, Wong DT. Emerging horizons of salivary diagnostics for periodontal disease. *Br Dent J.* 2014;217(10):567-73.
- Barnes VM, Kennedy AD, Panagakos F, Devizio W, Trivedi HM, Jonsson T, et al. Global metabolomic analysis of human saliva and plasma from healthy and diabetic subjects, with and without periodontal disease. *PLoS One.* 2014;9(8):e105181.
- Palm F, Lahdentausta L, Sorsa T, Tervahartiala T, Gokel P, Buggle F, et al. Biomarkers of periodontitis and inflammation in ischemic stroke: A case-control study. *Innate Immun.* 2014;20(5):511-8.
- Mariani S, Minunni M. Surface plasmon resonance applications in clinical analysis. *Anal Bioanal Chem.* 2014;406(9-10):2303-23.
- Mitchell AL, Gajjar KB, Theophilous G, Martin FL, Martin-Hirsch PL. Vibrational spectroscopy of biofluids for disease screening or diagnosis: translation from the laboratory to a clinical setting. *J Biophotonics.* 2014;7(3-4):153-65.
- Biehle-Hulette SJ, Krailler JM, Elstun LT, Bentz S, Benzing KW, Spruell RD, et al. Thermoregulatory vs. event sweating - comparison of clinical methodologies, physiology and results. *Int J Cosmet Sci.* 2014;36(1):102-8.
- Morreale M, Marchione P, Giacomini P, Pontecorvo S, Marianetti M, Vento C, et al. Neurological involvement in primary Sjögren syndrome: a focus on central nervous system. *PLoS One.* 2014;9(1):e84605.
- Mattes W, Yang X, Orr MS, Richter P, Mendrick DL. Biomarkers of tobacco smoke exposure. *Adv Clin Chem.* 2014;67:1-45.
- Justino CI, Duarte K, Lucas S, Chaves P, Bettencourt P, Freitas AC, et al. Assessment of cardiovascular disease risk using immunosensors for determination of C-reactive protein levels in serum and saliva: a pilot study. *Bioanalysis.* 2014;6(11):1459-70.
- Christodoulides N, De La Garza R, Simmons GW, McRae MP, Wong J, Kosten TR, et al. Programmable Bio-Nano-Chip system for saliva diagnostics. *SPIE Proceedings.* 2014;9112:911206.
- Ebersole J, Kryscio RJ, Campbell C, Kinane DF, McDevitt JT, Christodoulides N, et al. Serum and salivary cardiac analytes in acute myocardial infarction related to oral health status. *SPIE Proceedings.* 2014;9112:91120G.
- Bennett JM, Rodrigues IM, Klein LC. Effects of caffeine and stress on biomarkers of cardiovascular disease in healthy men and women with a family history of hypertension. *Stress Health.* 2013;29(5):401-9.
- Emwas AM, Salek RM, Griffin JL, Merzaban J. NMR-based metabolomics in human disease diagnosis: applications, limitations, and recommendations. *Metabolomics.* 2013;9(5):1048-72.
- Siemelink M, van der Laan S, Timmers L, Hoefer I, Pasterkamp G. Taking risk prediction to the next level. Advances in biomarker research for atherosclerosis. *Curr Pharm Des.* 2013;19(33):5929-41.
- Durham P, Papapetropoulos S. Biomarkers associated with migraine and their potential role in migraine management. *Headache.* 2013;53(8):1262-77.
- Jin XF, Wu N, Wang L, Li J. Circulating microRNAs: a novel class of potential biomarkers for diagnosing and prognosing central nervous system diseases. *Cell Mol Neurobiol.* 2013;33(5):601-13.
- Mirick DK, Bhatti P, Chen C, Nordt F, Stanczyk FZ, Davis S. Night shift work and levels of 6-sulfatoxymelatonin and cortisol in men. *Cancer Epidemiol Biomarkers Prev.* 2013;22(6):1079-87.
- Rayner KJ, Hennessy EJ. Extracellular communication via microRNA: lipid particles have a new message. *J Lipid Res.* 2013;54(5):1174-81.
- Clancy KB, Klein LD, Ziomkiewicz A, Nenko I, Jasienska G, Bribiescas RG. Relationships between biomarkers of inflammation, ovarian steroids, and age at menarche in a rural polish sample. *Am J Hum Biol.* 2013;25(3):389-98.
- Tothova L, Ostatnikova D, Sebekova K, Celec P, Hodosy J. Sex differences of oxidative stress markers in young healthy subjects are marker-specific in plasma but not in saliva. *Ann Hum Biol.* 2013;40(2):175-80.
- De Jager W, Holzinger D, Rijkers GT. Biomarkers in inflammatory childhood diseases. *Mediators Inflamm.* 2013;745493.
- Wentworth BA, Stein MB, Redwine LS, Xue Y, Taub PR, Clopton P, et al. Post-traumatic stress disorder: a fast track to premature cardiovascular disease?. *Cardiol Rev.* 2013;21(1):16-22.
- Sanchez BN, Wu M, Raghunathan TE, Diez-Roux AV. Modeling the salivary cortisol profile in population research: the multi-ethnic study of atherosclerosis. *Am J Epidemiol.* 2012;176(10):918-28.
- Punyadeera C. Human saliva as a tool to investigate intimate partner violence. *Brain Behav Immun.* 2012;26(4):541-2.
- Parkinson J, Muthas D, Clark M, Boyer S, Valentin JP, Ewart L. Application of data mining and visualization techniques for the prediction of drug-induced nausea in man. *Toxicol Sci.* 2012;126(1):275-84.
- DeCaro JA, Worthman CM. Changing family routines at kindergarten entry predict biomarkers of parental stress. *Int J Behav Dev.* 2011;35(5):441-448.
- Eller NH, Kristiansen J, Hansen AM. Long-term effects of psychosocial factors of home and work on biomarkers of stress. *Int J Psychophysiol.* 2011;79(2):195-202.
- Hoffmann RR, Yurgel LS, Campos MM. Evaluation of salivary endothelin-1 levels in oral squamous cell carcinoma and oral leukoplakia. *Regul Pept.* 2011;166(1-3):55-8.
- Sofia M, Maniscalco M, de Laurentis G, Paris D, Melck D, Motta A. Exploring airway diseases by NMR-based metabonomics: a review of application to exhaled breath condensate. *J Biomed Biotechnol.* 2011;2011:403260.
- Chandola T, Heraclides A, Kumari M. Psychophysiological biomarkers of workplace stressors. *Neurosci Biobehav Rev.* 2010;35(1):51-7.
- Rohleder N, Marin TJ, Ma R, Miller GE. Biologic cost of caring for a cancer patient: dysregulation of pro- and anti-inflammatory signaling pathways. *J Clin Oncol.* 2009;27(18):2909-15.
- Llewellyn DJ, Lang IA, Langa KM, Naughton F, Matthews FE. Exposure to secondhand smoke and cognitive impairment in non-smokers: national cross sectional study with cotinine measurement. *BMJ.* 2009;338:b462.
- Choolani MNarasimhan K, Kolla V, Hahn S. Proteomic technologies for prenatal diagnostics: advances and challenges ahead. *Expert Rev Proteomics.* 2009;6(1):87-101.
- Sayed HM, El-Latif HAA, Eid NI, Elsayed AZ, El-Kader EMA. Potential antihypertensive and antioxidative effects of Nigella sativa seeds or biomass and Syzyguim aromaticum extracts on L-Name-Induced hypertensive rats. *Egypian J Pharm Sci.* 2009;50:127-146.
- Rao PV, Reddy AP, Lu X, Dasari S, Krishnaprasad A, Biggs E, et al. Proteomic identification of salivary biomarkers of type-2 diabetes. *J Proteome Res.* 2009;8(1):239-45.
- Arregger AL, Cardoso EM, Tumilasci O, Contreras LN. Diagnostic value of salivary cortisol in end stage renal disease. *Steroids.* 2008;73(1):77-82.
- Shaw JL, Diamandis EP. Distribution of 15 human kallikreins in tissues and biological fluids. *Clin Chem.* 2007;53(8):1423-32.
- Herr AE, Hatch AV, Throckmorton DJ, Tran HM, Brennan JS, Giannobile WV, et al. Microfluidic immunoassays as rapid saliva-based clinical diagnostics. *Proc Natl Acad Sci USA.* 2007;104(13):5268-73.
- Molina C, Alliende C, Aguilera S, Kwon YJ, Leyton L, Martinez B, et al. Basal lamina disorganisation of the acini and ducts of labial salivary glands from patients with Sjogren's syndrome: association with mononuclear cell infiltration. *Ann Rheum Dis.* 2006;65(2):178-83.

**GOOGLE SCHOLAR**

- Nater UM, Rohleder N. Salivary alpha-amylase as a non-invasive biomarker for the sympathetic nervous system: Current state of research. *Psychoneuroendocrinology.* 2009;34(4):486-96.
- Ridker PM, Hennekens CH, Buring JE, Rifai N. C-Reactive Protein and Other Markers of Inflammation in the Prediction of Cardiovascular Disease in Women. *N Engl J Med.* 2000;342(12):836-43.
- Pfaffe T, Cooper-White J, Beyerlein P, Kostner K, Punyadeera C. Diagnostic Potential of Saliva: Current State and Future Applications. *Clin Chem.* 2011;57(5):675-87.
- Christodoulides N, Floriano PN, Miller CS, Ebersole JL, Mohanty S, Dharshan P, et al. Lab-on-a-Chip Methods for Point-of-Care Measurements of Salivary Biomarkers of Periodontitis. *Ann N y Acad Sci.* 2007;1098:411-28.
- Sorsa T, Tervahartiala T, Leppilahti J, Hernandez M, Gamonal J, Tuomainen, et al. Collagenase-2 (MMP-8) as a point-of-care biomarker in periodontitis and cardiovascular diseases. Therapeutic response to non-antimicrobial properties of tetracyclines. *Pharmacol Res.* 2011;63(2):108-13.
- Lee YH, Wong DT. Saliva: An emerging biofluid for early detection of diseases. *Am J Dent.* 2009;22(4):241-8.
- Wong DT. Salivary diagnostics powered by nanotechnologies, proteomics and genomics. *J Am Dent Assoc.* 2006;137(3):313-21.
- Zhang L, Henson BS, Camargo PM, Wong DT. The clinical value of salivary biomarkers for periodontal disease. *Periodontol 2000.* 2009;51:25-37.
- Beck JD, Offenbacher S. Systemic Effects of Periodontitis: Epidemiology of Periodontal Disease and Cardiovascular Disease. *J Periodontol.* 2005;76(11 Suppl):2089-100
- Zhang L, Xiao H, Wong DT. Salivary Biomarkers for Clinical Applications. *Mol Diagn Ther.* 2009;13(4):245-59.
- Rathnayake N, Akerman S, Klinge B, Lundegren N, Jansson H, Tryselius Y, et al. Salivary Biomarkers for Detection of Systemic Diseases. *PLoS One.* 2013;8(4):e61356.
- Granger DA, Kivlighan KT, el-Sheikh M, Gordis EB, Stroud LR. Salivary α-Amylase in Biobehavioral Research: recent developments and applications. *Ann N Y Acad Sci.* 2007;1098:122-44.
- Frodge BD, Ebersole JL, Kryscio RJ, Thomas MV, Miller CS. Bone Remodeling Biomarkers of Periodontal Disease in Saliva. *J Periodontol.* 2008;79(10):1913-9.
- Christodoulides N, Mohanty S, Miller CS, Langub MC, Floriano PN, Dharshan P, et al. Application of microchip assay system for the measurement of C-reactive protein in human saliva. *Lab Chip.* 2005;5(3):261-9.
- Devic I, Hwang H, Edgar JS, Izutsu K, Presland R, Pan C, et al. Salivary α-synuclein and DJ-1: potential biomarkers for Parkinson's disease. *Brain.* 2011;134(Pt 7):e178.
- Burt B, Research, Science and Therapy Committee of the AAP. Position Paper: Epidemiology of Periodontal Diseases. *J Periodontol.* 2005;76(8):1406-19.
- Farrell JJ, Zhang L, Zhou H, Chia D, Elashoff D, Akin D, et al. Variations of oral microbiota are associated with pancreatic diseases including pancreatic cancer. *Gut.* 2012;61(4):582-8.
- St John MA, Li Y, Zhou X, Denny P, Ho CM, Montemagno C, et al. Interleukin 6 and Interleukin 8 as Potential Biomarkers for Oral Cavity and Oropharyngeal Squamous Cell Carcinoma. *Arch Otolaryngol Head Neck Surg.* 2004;130(8):929-35.
- Dalle-Donne I, Rossi R, Colombo R, Giustarini D, Milzani A. Biomarkers of Oxidative Damage in Human Disease. *Clin Chem.* 2006;52(4):601-23.
- Segal A, Wong DT. Salivary diagnostics: enhancing disease detection and making medicine better. *Eur J Dent Educ.* 2008:12(1):22-9.
- Lee JM, Garon E, Wong DT. Salivary Diagnostics. *Orthod Craniofac Res.* 2009;12(3):206-11.
- Hu S, Loo JA, Wong DT. Human saliva proteome analysis and disease biomarker discovery. *Expert Rev Proteomics.* 2007;4(4):531-8.
- Danesh J, Wheeler JG, Hirschfield GM, Eda S, Eiriksdottir G, Rumley A, et al. C-Reactive Protein and Other Circulating Markers of Inflammation in the Prediction of Coronary Heart Disease. *N Engl J Med. 2004;350(14):1387-97.*
- Ng PY, Donley M, Hausmann E, Hutson AD, Rossomando EF, Scannapieco FA. Candidate salivary biomarkers associated with alveolar bone loss: cross-sectional and in vitro studies. *FEMS Immunol Med Microbiol.* 2007;49(2):252-60.
- Friedewald VE, Kornman KS, Beck JD, Genco R, Goldfine A, Libby P, et al. The American Journal of Cardiology and Journal of Periodontology Editors' Consensus: Periodontitis and Atherosclerotic Cardiovascular Disease. *Am J Cardiol.* 2009;104(1):59-68.
- Shulz AJ, Kannan S, Dvonch JT, Israel BA, Allen A 3rd, James SA, et al. Social and Physical Environments and Disparities in Risk for Cardiovascular Disease: The Healthy Environments Partnership Conceptual Model. *Environ Health Perspect.* 2005;113(12):1817-25
- Etheridge A, Lee I, Hood L, Galas D, Wang K. Extracellular microRNA: A new source of biomarkers. *Mutat Res.* 2011;717(1-2):85-90.
- Adam EK, Kumari M. Assessing salivary cortisol in large-scale, epidemiological research. *Psychoneuroendocrinology.* 2009;34(10):1423-36.
- Noyo Y, Sato T, Kudo M, Kurata K, Hirota K. The relationship between salivary biomarkers and state-trait anxiety inventory score under mental arithmetic stress: a pilot study. *Anesth Analg.* 2005;101(6):1873-6.
- Vitorino R, Lobo MJ, Ferrer-Correira AJ, Dubin JR, Tomer KB, Domingues PM, et al. Identification of human whole saliva protein components using proteomics. *Proteomics.* 2004;4(4):1109-15.
- Dillon MC, Opris DC, Kopanczyk R, Lickliter J, Cornwell HN, Bridges EG, et al. Detection of Homocysteine and C-Reactive Protein in the Saliva of Healthy Adults: Comparison with Blood Levels. *Biomark Insights.* 2010;5:57-61.
- Bertram HC, Eggers N, Eller N. Potential of Human Saliva for Nuclear Magnetic Resonance-Based Metabolomics and for Health-Related Biomarker Identification. *Anal Chem.* 2009;81(21):9188-93.
- Soskolne WA, Klinger A. The Relationship Between Periodontal Diseases and Diabetes: An Overview. *Ann Periodontol.* 2001;6(1):91-8.
- El-Sharkawy H, Aboelsaad N, Eliwa M, Darweesh M, Alshahat M, Kantarci A, et al. Adjunctive treatment of chronic periodontitis with daily dietary supplementation with omega-3 Fatty acids and low-dose aspirin. *J Periodontol.* 2010;81(11):1635-43.
- Mercado FB, Marshall RI, Klestov AC, Bartold PM. Relationship Between Rheumatoid Arthritis and Periodontitis. *J Periodontol.* 2001;72(6):779-87.
- Yeh CK, Christodoulides NJ, Floriano PN, Miller CS, Ebersole JL, Weigum SE, et al. Current Development of Saliva/Oral fluid-based Diagnostics. *Tex Dent J.*  2010;127(7):651-61.
- Akar H, Akar GC, Carrero JJ, Stenvinkel P, Lindholm B. Systemic Consequences of Poor Oral Health in Chronic Kidney Disease Patients. *Clin J Am Soc Nephrol.* 2011;6(1):218-26.
- Offenbacher S, Beck JD, Moss K, Mendoza L, Paquette DW, Barrow DA, et al. Results from the Periodontitis and Vascular Events (PAVE) Study: a pilot multicentered, randomized, controlled trial to study effects of periodontal therapy in a secondary prevention model of cardiovascular disease. *J Periodontol.* 2009;80(2):190-201.
- Tomar SL, Asma S. Smoking-attributable periodontitis in the United States: findings from NHANES III. *J Periodontol.* 2000;71(5):743-51.
- Spielmann N, Wong DT. Saliva: diagnostics and therapeutic perspectives. *Oral Dis.* 2011;17(4):345-54.
- Manson JE, Hsia J, Johnson KC, Rossouw JE, Assaf AR, Lasser NL, et al. Estrogen plus Progestin and the Risk of Coronary Heart Disease. *N Engl J Med.*  2003;349(6):523-34.
- Rohleder N, Nater UM. Determinants of salivary α-amylase in humans and methodological considerations. *Psychoneuroendocrinology.* 2009;34(4):469-85.
- Petersen PE, Ogawa H. Strengthening the Prevention of Periodontal Disease: The WHO Approach. *J Periodontol.* 2005;76(12):2187-93.
- Heikkinen AM, Sorsa T, Pitkaniemi J, Tervahartiala T, Kari K, Broms U, et al. Smoking Affects Diagnostic Salivary Periodontal Disease Biomarker Levels in Adolescents. *J Periodntol.* 2010;81(9):1299-307.
- Zhang A, Sun H, Wang X. Saliva Metabolomics Opens Door to Biomarker Discovery, Disease Diagnosis, and Treatment. *Appl Biochem Biotechnol.* 2012;168(8):1718-27.
- Kornman KS. Mapping the pathogenesis of periodontitis: a new look. *J Periodontol.* 2008;79(8 Suppl):1560-8.
- Wagner J, Cik M, Marth E, Santner BI, Gallasch E, Lackner A, et al. Feasibility of testing three salivary stress biomarkers in relation to naturalistic traffic noise exposure. *Int J Hyg Environ Health.* 2010;213(2):153-5.
- Hjortskov N, Garde AH, Orbaek P. Evaluation of salivary cortisol as a biomarker of self-reported mental stress in field studies. *Stress and Health.* 2004;20:91-98.
- Xi J, Takahashi R, Hiura Y, Hirokawa G, Fukushima Y, Iwai N. Plasma miR-208 as a Biomarker of Myocardial Injury. *Clin Chem.* 2009;55(11);1944-9.
- Streckfus CF, Mayorga-Wark O, Arreola D, Edwards C, Bigler L, Dubinsky WP. Breast Cancer Related Proteins Are Present in Saliva and Are Modulated Secondary to Ductal Carcinoma In Situ of the Breast. *Cancer Invest.* 2008;26(2):159-67.
- Taupenot L, Harper KL, O’Connor DT. The chromogranin-secretogranin family. *N Engl J Med.* 2003;348(12):1134-49.
- Giannobile WV, Beikler T, Kinney JS, Ramseier CA, Morelli T, Wong DT. Saliva as a diagnostic tool for periodontal disease: current state and future directions. *Periodontol 2000.* 2009;50:52-64.
- Drake RR, Cazare LH, Semmes OJ, Wadsworth JT. Serum, salivary and tissue proteomics for discovery of biomarkers for head and neck cancers. *Expert Rev Mol Diagn.* 2005;5(1):93-100.
- Oullet-Morin I, Danese A, Williams B, Arseneault L. Validation of a high-sensitivity assay for C-reactive protein in human saliva. *Brain Behav Immun.* 2011;25(4):640-6.
- Gerszten RE, Asnani A, Carr SA. Status and Prospects for Discovery and Verification of New Biomarkers of Cardiovascular Disease by Proteomics. *Circ Res.* 2011;109(4):463-74.
- Costa PP, Trevisin GL, Macedo GO, Palioto DB, Souza SL, Grisi MF, et al. Salivary Interleukin-6, Matrix Metalloproteinase-8, and Osteoprotegerin in Patients With Periodontitis and Diabetes.*J Periodontol.* 2010;81(3):384-91.
- Goodman E, McEwen BS, Huang B, Dolan LM, Adler NE. Social Inequalities in Biomarkers of Cardiovascular Risk in Adolescence. *Psychosom Med.* 2005;67(1):9-15.
- Godin B, Sakamoto JH, Serda RE, Grattoni A, Bouamrani A, Ferrari M. Emerging applications of nanomedicine for the diagnosis and treatment of cardiovascular diseases. *Trends Pharmacol Sci.* 2010;31(5):199-205.
- Fox PC. Autoimmune Diseases and Sjögren's Syndrome: an autoimmune exocrinopathy. *Ann N y Acad Sci.* 2007;1098:15-21.
- Al Kawas S, Rahim ZH, Ferguson DB. Potential uses of human salivary protein and peptide analysis in the diagnosis of disease. *Arch Oral Biol.* 2012;57(1):1-9.
- Griffin SO, Barker LK, Griffin PM, Cleveland JL, Kohn W. Oral Health Needs Among Adults in the United States With Chronic Diseases. *J Am Dent Assoc.* 2009;140(10):1266-74.
- Mattila KJ, Pussinen PJ, Paju S. Dental Infections and Cardiovascular Diseases: A Review. *J Periodontol.* 2005;76(11 Suppl):2085-8.
- Izawa S, Sugaya N, Shirotsuki K, Yamada KC, Ogawa N, Ouchi Y, et al. Salivary dehydroepiandrosterone secretion in response to acute psychosocial stress and its correlations with biological and psychological changes. *Biol Psychol.* 2008;79(3):294-8.
- Faught BE, Flouris AD, Cairney J. Epidemiological Evidence Associating Secondhand Smoke Exposure with Cardiovascular Disease. *Inflamm Allergy Drug Targets.* 2009;8(5):321-7.
- Lee A, Ghaname CB, Braun TM, Sugai JV, Teles RP, Loesche WJ, et al. Bacterial and Salivary Biomarkers Predict the Gingival Inflammatory Profile. *J Periodontol.* 2012;83(1):79-89.
- Bonassi S, Neri M, Puntoni R. Validation of biomarkers as early predictors of disease. *Mutat Res.* 2001;480-481:349-58.
- Piazza JR, Almeida DM, Dmitrieva NO, Klein LC. Frontiers in the Use of Biomarkers of Health in Research on Stress and Aging. *J Gerontol B Psychol Sci Soc Sci.* 2010;65(5):513-25.
- Castagnola M, Picciotti PM, Messana I, Fanali C, Fiorita A, Cabras T, et al. Potential applications of human saliva as diagnostic fluid. *Acta Otohinolaryngol Ital.* 2011;31(6):347-57.
- Kristenson M, Garvin P, Ulf Lundberg. *The Role of Saliva Cortisol Measurement in Health and Disease.* 2011;4:1-207.
- Avsar A, Darka O, Topaloglu B, Bek Y. Association of passive smoking with caries and related salivary biomarkers in young children. *Arch Oral Biol.* 2008;53(10):969-74.
- Peker Y, Hedner J, Kraiczi H, Loth, S. Respiratory Disturbance Index - An Independent Predictor of Mortality in Coronary Artery Disease. *Am J Respira Crit Care Med.* 2000;162(1):81-6.
- Kumari M, Shipley M, Stafford M, Kivimaki M. Association of Diurnal Patterns in Salivary Cortisol with All-Cause and Cardiovascular Mortality: Findings from the Whitehall II Study. *J Clin Endocrinol Metab.* 2011;96(5):1478-85.
- Armitage GC, Wu Y, Wang HY, Sorrell J, di Giovine FS, Duff GW. Low prevalence of a periodontitis-associated interleukin-1 composite genotype in individuals of Chinese heritage. *J Periodontol.* 2000;71(2):164-71.
- Offenbacher S, Barros SP, Singer RE, Moss K, Williams RC, Beck JD. Periodontal Disease at the Biofilm–Gingival Interface. *J Periodontol.* 2007;78(10):1911-25.
- Malamud D, Niedbala R. *Oral-based Diagnostics.* 2007. Blackwell Pub. New York Academy of Sciences, Boston, Mass.
- Fine DH, Markowitz K, Furgang D, Fairlie K, Ferrandiz J, Nasri C, et al. Macrophage Inflammatory Protein-1α: A Salivary Biomarker of Bone Loss in a Longitudinal Cohort Study of Children at Risk for Aggressive Periodontal Disease?. *J Periodontol.* 2009;80(1):106-13.
- Mulcahy M, Evans DS, Hammond SK, Repace JL, Byrne M. Secondhand smoke exposure and risk following the Irish smoking ban: an assessment of salivary cotinine concentrations in hotel workers and air nicotine levels in bars. *Tob Control*. 2005;14(6):384-8.
- Nishida N, Yamamoto Y, Tanaka M, Kataoka K, Kuboniwa M, Nakayama K, et al. Association Between Involuntary Smoking and Salivary Markers Related to Periodontitis: A 2-Year Longitudinal Study. *J Periodontol*. 2008;79(12):2233-40.
- Ozer J, Ratner M, Shaw M, Bailey W, Schomaker S. The current state of serum biomarkers of hepatotoxicity. *Toxicology.* 2008;245(3):194-205.
- Hamer M, O’Donnell K, Lahiri A, Steptoe A. Salivary cortisol responses to mental stress are associated with coronary artery calcification in healthy men and women. *Eur Heart J.* 2010;31(4):424-9.
- Brotman DJ, Girod JP, Garcia MJ, Patel JV, Gupta M, Posch A, et al. Effects of Short-Term Glucocorticoids on Cardiovascular Biomarkers. *J Clin Endocrinol Metab.* 2005;90(6):3202-8.
- Farnaud SJC, Kosti O, Getting SJ, Renshaw D. Saliva: Physiology and Diagnostic Potential in Health and Disease. *Scientific World Journal.* 2010;10:434-56.
- Pihlstrom BL, Michalowicz BS, Johnson NW. Periodontal Diseases. *Lancet.* 2005;366(9499):1809-20.
- Salivary DNA, lipid, and protein oxidation in nonsmokers with periodontal disease

Su H, Gornitsky M, Velly AM, Yu H, Benarroch M, Schipper HM.

- Cheng YL, Rees T, Jordan L, Oxford L, O’Brien J, Chen HS, et al. Salivary endothelin-1 potential for detecting oral cancer in patients with oral lichen planus or oral cancer in remission. *Oral Oncol.* 2011;47(12):1122-6.
- Herder C, Karakas M, Koenig W. Biomarkers for the prediction of type 2 diabetes and cardiovascular disease. *Clin Pharmacol Ther.* 2011;90(1):52-66.
- Gupta M, Chaturvedi R, Jain A. Role of monocyte chemoattractant protein-1 (MCP-1) as an immune-diagnostic biomarker in the pathogenesis of chronic periodontal disease. *Cytokine.* 2013;61(3):892-7.
- Danhof-Pont MB, van Veen T, Zitman FG. Biomarkers in burnout: A systematic review. *J Psychosom Res.* 2011;70(6):505-24.
- Taylor GW. Bidirectional Interrelationships Between Diabetes and Periodontal Diseases: An Epidemiologic Perspective. *Ann Periodontol.* 2001;6(1):99-112.
- Miricescu D, Greabu M, Totan A, Didilescu A, Radulescu R. The antioxidant potential of saliva: clinical significance in oral diseases. *Therapeutics, Pharmacology and Clinical Toxicology.* 2011;15(2):139-43.
- Holt-Lunstad J, Birmingham WA, Light KC. Influence of a “warm touch” support enhancement intervention among married couples on ambulatory blood pressure, oxytocin, alpha amylase, and cortisol. *Psychosom Med.* 2008;70(9):976-85.
- Giannobile WV. Salivary diagnostics for periodontal diseases. *J Am Dent Assoc.* 2012;143(10 Suppl):6s-11s.
- Nater UM, Rohleder N, Gaab J, Berger S, Jud A, Kirschbaum C, et al. Human salivary alpha-amylase reactivity in a psychosocial stress paradigm. *Int J Psychophysiol.* 2005;55(3):333-42.
- Groer M, Murphy R, Bunnell W, Saomon K, Van Eepoel J, Rankin B, White K, et al. Salivary Measures of Stress and Immunity in Police Officers Engaged in Simulated Critical Incident Scenarios. *J Occup Environ Med.* 2010;52(6):595-602.
- Moe KT, Wong P. Current trends in diagnostic biomarkers of acute coronary syndrome. *Ann Acad Med Singapore.* 2010;39(3):210-5.
- Dowd JB, Goldman N. Do biomarkers of stress mediate the relation between socioeconomic status and health?. *J Epidemiol Community Health.* 2006;60(7):633-9.
- Lykkesfeldt J. Malondialdehyde as biomarker of oxidative damage to lipids caused by smoking. *Clin Chim Acta.* 2007;380(1-2):50-8.
- Benowitz NL, Hukkanen J, Jacob P 3rd. Nicotine Chemistry, Metabolism, Kinetics and Biomarkers. *Handb Exp Pharmacol.* 2009;192:29-60.
- Almela M, Hidalgo V, Villada C, van der Meij L, Espin L, Gomez-Amor J, et al. Salivary alpha-amylase response to acute psychosocial stress: The impact of age. *Biol Psychol.* 2011;87(3):421-9.
- Border MB, Schwartz S, Carlson J, Dibble CF, Kohltfarber H, Offenbacher S, et al. Exploring salivary proteomes in edentulous patients with type 2 diabetes. *Mol Biosyst.* 8(4):1304-10.

- Crimmins E, Vasunilashorn S, Kim JK, Alley D. Biomarkers Related To Aging In Human Populations. *Adv Clin Chem.* 2008;46:161-216.
- Gallina S, Di Mauro M, D/Amico MA, D’Angelo E, Sablone A, Bascelli A, et al. Salivary chromogranin A, but not α-amylase, correlates with cardiovascular parameters during high-intensity exercise. *Clin Endocrinol.* 2011;75(6):747-52.
- Baker M. *In biomarkers we trust?. Nat Biotechnol.* 2005;23(3):297-304.
- Loucks EB, Juster RP, Pruessner JC. Neuroendocrine biomarkers, allostatic load, and the challenge of measurement: A commentary on Gersten. *Social Science and Medicine.* 2008;66(3):525-30.
- Offenbacher S, Barros SP, Beck JD. Rethinking periodontal inflammation. *J Periodontol.* 2008;79(8 Suppl):1577-84.
- Maillard-Lefebvre H, Boulanger E, Droux M, Gaxatte C, Hudson BI, Lambert M. Soluble receptor for advanced glycation end products: a new biomarker in diagnosis and prognosis of chronic inflammatory diseases. *Rheymatology.* 2009;48(10):1190-6.
- Yasuda M, Ide H, Furuya K, Yoshii T, Nishio K, Saito K, et al. Salivary 8-OHdG: A Useful Biomarker for Predicting Severe ED and Hypogonadism. *J Sex Med.* 2008;5(6):1482-91.
- Dekker MJ, Koper JW, van Aken MO, Pols HA, Hofman A, de Jong FH, et al. Salivary Cortisol Is Related to Atherosclerosis of Carotid Arteries. *J Clin Endocrinol Metab.* 2008;93(10):3741-7.
- Novak MJ, Johns LP, Miller RC, Bradshaw MH. Adjunctive benefits of subantimicrobial dose doxycycline in the management of severe, generalized, chronic periodontitis. *J Periodontol.* 2002;73(7):762-9.
- Dietrich M, Block G, Hudes M, Morrow JD, Norkus EP,Traber MG, et al. Antioxidant Supplementation Decreases Lipid Peroxidation Biomarker F2-isoprostanes in Plasma of Smokers. *Cancer Epidemiol Biomarkers Prev.* 2002;11(1):7-13.
- Manenschijn L, Schaap L, van Schoor NM, van der Pas S, Peeters Gm, Lips P, et al. High Long-Term Cortisol Levels, Measured in Scalp Hair, Are Associated With a History of Cardiovascular Disease. *J Clin Endocrinol Metab.* 2013;98(5):2078-83.
- Dowd JB, Simanek AM, Aiello AE. Socio-economic status, cortisol and allostatic load: a review of the literature. *Int J Epidemiol.* 2009;38(5):1297-309.
- Jonsson R, Bolstad AI, Brokstad KA, Brun JG. Sjögren's syndrome—A plethora of clinical and immunological phenotypes with a complex genetic background. *Ann N Y Acad Sci.* 2007;1108:433-7.
- De Vriendt T, Moreno LA, De Henauw S. Chronic stress and obesity in adolescents: scientific evidence and methodological issues for epidemiological research. *Nutr Metab Cardiovasc Dis.* 2009;19(7):511-9.
- Clements JA, Willemsen NM, Myers SA, Dong Y. The Tissue Kallikrein Family of Serine Proteases: Functional Roles in Human Disease and Potential as Clinical Biomarkers. *Crit Rev Clin Lab Sci.* 2004;41(3):365-312.
- Del Tredici K, Hawkes CH, Ghebremedhin E, Braak H. Lewy pathology in the submandibular gland of individuals with incidental Lewy body disease and sporadic Parkinson’s disease. *Acta Neuropathol.* 2010;119(6):703-13.
- Kusano C, Ferrari B. Total antioxidant capacity: a biomarker in biomedical and nutritional studies. *J Cell Mol Biol.* 2008;7(1):1-15.
- Furuholm J, Sorsa T, Qvarnstrom M, Janket SJ,Tervahartiala T, Nuutinen P, et al. Salivary matrix metalloproteinase-8 in patients with and without coronary heart disease may indicate an increased susceptibility to periodontal disease. *J Periodontal Res.* 2006;41(5):486-9.
- Pischon N, Pischon T, Kroger J, Gulmez E, Kleber BM, Bernimoulin JP, et al. Association Among Rheumatoid Arthritis, Oral Hygiene, and Periodontitis. *J Periodontol.* 2008;79(6):979-86.
- Filaire E, Dreux B, Massart A, Nourrit B, Rama LM, Teixeira A. Salivary alpha-amylase, cortisol and chromogranin A responses to a lecture: impact of sex. *Eur J Appl Physiol.* 2009;106(1):71-7.
- McCormick RK. Osteoporosis: integrating biomarkers and other diagnostic correlates into the management of bone fragility. *Altern Med Rev.* 2007;12(2):113-45.
- Bermejo-Pareja F, Anteguera D, Vargas T, Molina JA, Carro E. Saliva levels of Abeta1-42 as potential biomarker of Alzheimer's disease: a pilot study. *BMC Neurol.* 2010;10:108.
- Meyers DG, Neuberger JS, He J. Cardiovascular Effect of Bans on Smoking in Public Places - A Systematic Review and Meta-Analysis. *J Am Coll Cardiol.* 2009;54(14):1249-55.
- Nakata A. Psychosocial job stress and immunity: a systematic review. *Methods Mol Biol.* 2012;934:39-75.
- Montalto NJ, Wells WO. Validation of Self-Reported Smoking Status Using Saliva Cotinine: A Rapid Semiquantitative Dipstick Method. *Cancer Epidemiol Biomarkers Prev.* 2007;16(9):1858-62.
- Carlson LE, Speca M, Patel KD, Goodey E. Mindfulness-based stress reduction in relation to quality of life, mood, symptoms of stress and levels of cortisol, dehydroepiandrosterone sulfate (DHEAS) and melatonin in breast and prostate cancer outpatients. *Psychoneuroendocrinology.* 2004;29(4):448-74.
- Tlili C, Cella LN, Myung NV, Shetty V, Mulchandani A. Single-walled carbon nanotube chemoresistive label-free immunosensor for salivary stress biomarkers. *Analyst.* 2010;135(10):2637-42.
- Christodoulides N, Pierre FN, Sanchez X, Li L, Hocguard K, Patton A, et al. Programmable Bio-Nano-Chip Technology for the Diagnosis of Cardiovascular Disease at the Point-of-Care. *Methodist Debakey Cardiovasc J.* 2012;8(10):6-12.
- Campisi J, Bravo Y, Cole J, Gobeil K. Acute psychosocial stress differentially influences salivary endocrine and immune measures in undergraduate students. *Physiol Behav.* 2012;107(3):317-21.
- Goodman WG, Goldin J, Kuizon BD, Yoon C, Gales B, Sider D, et al. Coronary-Artery Calcification in Young Adults with End-Stage Renal Disease Who Are Undergoing Dialysis. *N Engl J Med.* 2000;342(20):1478-83.
- Loos BG, Craandijk J, Hoek FJ, Wertheim-van Dillen PM, van der Velden U. Elevation of Systemic Markers Related to Cardiovascular Diseases in the Peripheral Blood of Periodontitis Patients. *J Periodontol.* 2000;71(10):1528-34.
- Scherer G, Engl J, Urban M, Glich G, Janket D, Riedel K. Relationship between machine-derived smoke yields and biomarkers in cigarette smokers in Germany. *Regul Toxicol Pharmacol.* 2007;47(2):171-83.
- Peruzzo DC, Benatti BB, Ambrosano GM, Nogueira-Filho GR, Sallum EA, Casati MZ, et al. A Systematic Review of Stress and Psychological Factors as Possible Risk Factors for Periodontal Disease. *J Periodontol.* 2007;78(8):1491-504.
- Kudielka BM, Gierens A, Hellhammer DH, Wust S, Schlots W. Salivary Cortisol in Ambulatory Assessment Some Dos, Some Donts, and Some Open Questions. *Psychosom Med.* 2012;74(4):418-31.
- Babisch W. Road traffic noise and cardiovascular risk. *Noise Health.* 2008;10(38):27-33.
- Zhang A, Sun H, Wang P, Wang X. Salivary proteomics in biomedical research. *Clin Chim Acta.* 2013;415:261-5.
- Grewen KM, Davenport RE, Light KC. An investigation of plasma and salivary oxytocin responses in breast- and formula-feeding mothers of infants. *Psychophysiology.* 2010;47(4):625-32.
- Yoon AJ, Cheng B, Philipone E, turner R, Lamster IB. Inflammatory biomarkers in saliva: assessing the strength of association of diabetes mellitus and periodontal status with the oral inflammatory burden. *J Clin Periodontol.* 2012;39(5):434-40.
- Jokerst JV, McDevitt JT. Programmable nano-bio-chips: multifunctional clinical tools for use at the point-of-care. *Nanomedicine.* 2010;5(1):143-55.
- Kharitonov SA, Barnes PJ. Biomarkers of some pulmonary diseases in exhaled breath. *Biomarkers.* 2002;7(1):1-32.
- Metabolomics Reveals Elevated Macromolecular Degradation in Periodontal Disease

Barnes VM, Ciancio SG, Shibly O, Xu T, Devizio W, Trivedi HM, et al. *J Dent Res.* 2011;90(11):1293-7.

- Torano JS, van Kan HJ. Simultaneous determination of the tobacco smoke uptake parameters nicotine, cotinine and thiocyanate in urine, saliva and hair, using gas chromatography-mass spectrometry for characterisation of smoking status of recently exposed subjects. *Analyst.* 2003;128(7):838-43.
- Gavrilova N, Lindau ST. Salivary Sex Hormone Measurement in a National, Population-Based Study of Older Adults. *J Gerontol B Psychol Sci Soc Sci.* 2009;64(1):i94-105.
- Kudielka BM, Hellhammer DH, Wust S. Why do we respond so differently? Reviewing determinants of human salivary cortisol responses to challenge. *Psychoneuroendocrinology.* 2009;34(1):2-18.
- Silverman MN, Heim CM, Nater UM, Marques AH, Sternberg EM. Neuroendocrine and immune contributors to fatigue. *PM R.* 2010;2(5):338-46.
- Hansel A, Hong S, Camara RJ, von Kanel R. Inflammation as a psychophysiological biomarker in chronic psychosocial stress. *Neurosci Biobehav Rev.* 2010;35(1):115-21.
- Aiello AE, Kaplan GA. Socioeconomic Position and Inflammatory and Immune Biomarkers of Cardiovascular Disease: Applications to the Panel Study of Income Dynamics. *Biodemography Soc Biol.* 2009;55(2):178-205.
- Al-Zahrani MS, Bissada NF, Borawskit EA. Obesity and Periodontal Disease in Young, Middle-Aged, and Older Adults. *J Periodontol.* 2003;74(5):610-5.
- Ridker PM, Silvertown JD. Inflammation, C-reactive protein, and atherothrombosis. *J Periodontol.* 2008;79(8 Suppl):1544-51.
- Zhu H, Fan GC. Extracellular/circulating microRNAs and their potential role in cardiovascular disease. *Am J Cardiovasc Dis.* 2011;1(2):138-49.
- Boehm TK, Scannapieco FA. The Epidemiology, Consequences and Management of Periodontal Disease in Older Adults. *J Am Dent Assoc.* 2007;138:26S-33S.
- Scherer G. Carboxyhemoglobin and thiocyanate as biomarkers of exposure to carbon monoxide and hydrogen cyanide in tobacco smoke. *Exp Toxicol Pathol.* 2006;58(2-3):101-24.
- Miricescu D, Totan A, Calenic B, Mocanu B, Didilescu A, Mohora M, et al. Salivary biomarkers: Relationship between oxidative stress and alveolar bone loss in chronic periodontitis. *Acta Odontol Scand.* 2014;72(1):42-7.
- Phillips AC, Carroll D, Evans P, Bosch JA, Clow A, Hucklebridge F, et al. Stressful life events are associated with low secretion rates of immunoglobulin A in saliva in the middle aged and elderly. *Brian Behav Immun.* 2006;20(2):191-7.
- Maksimowicz-McKinnon K, Bhatt DL, Calabrese LH. Recent advances in vascular inflammation: C-reactive protein and other inflammatory biomarkers. *Curr Opin Rheumatol.* 2004;16(1):18-24.
- Soukup M, Biesiada I, Henderson A, Idowu B, Rodeback D, Ridpath L, et al. Salivary uric acid as a noninvasive biomarker of metabolic syndrome. *Diabetol Metab Syndr.* 2012;4(1):14.
- Vaidya VS, Ferguson MA, Bonventre JV. Biomarkers of Acute Kidney Injury. *Annu Rev Pharmacol Toxicol.* 2008;48:463-93.
- Gustafsson A, Ajeti V, Ljunggren L. Detection of suPAR in the Saliva of Healthy Young Adults: Comparison with Plasma Levels. *Biomark Insights.* 2011;6:119-125.
- Hellhammer DH, Wust S, Kudielka BM. Salivary cortisol as a biomarker in stress research. *Psychoneuroendocrinology.* 2009;34(2):163-71.
- Allegra A, Alonci A, Campo S, Penna G, Petrungaro A, Gerace D, et al. Circulating microRNAs: New biomarkers in diagnosis, prognosis and treatment of cancer. *Int J Oncol.* 2012;41(6):1897-912.
- Maina G, Palmas A, Bovenzi M, Filon FL. Salivary cortisol and psychosocial hazards at work. *Am J Ind Med.* 2009;52(3):251-60.
- Karlsson H, Leanderson P, Tagesson C, Lindahl M. Lipoproteomics II: Mapping of proteins in high-density lipoprotein using two-dimensional gel electrophoresis and mass spectrometry. *Proteomics.* 2005;5(5):1431-45.
- Bellingrath S, Weigl T, Kudielka BM. Cortisol dysregulation in school teachers in relation to burnout, vital exhaustion, and effort–reward-imbalance. *Biol Psychol.* 2008;78(1):104-13.
- Strahler J, Mueller A, Rosenloecher F, Kirschbaum C, Rohleder N. Salivary α-amylase stress reactivity across different age groups. *Pschophysiology.* 2010;47(3):587-95.
- Budnelli N, Kinane DF. Host‐derived diagnostic markers related to soft tissue destruction and bone degradation in periodontitis. *J Clin Periodontol.* 2011;38(11):85-105.
- Persson GR, Persson RE. Cardiovascular disease and periodontitis: an update on the associations and risk. *J Clin Periodontol.* 2008;35(8):362-79.
- Lima DP, Diniz DG, Moimaz SA, Sumida DH, Okamoto AC. *Saliva: reflection of the body. Int J Infect Dis.* 2010;14(3):e184-8.
- Bassim CW, Redman RS, DeNucci DJ, Becker KL, Nylen ES. Salivary Procalcitonin and Periodontitis in Diabetes. *J Dent Res.* 2008;87(7):630-4.
- Smith GD, Ben-Shlomo Y, Beswick A, Yarnell J, Lightman S, Elwood P. Cortisol, Testosterone, and Coronary Heart Disease Prospective Evidence From the Caerphilly Study. *Circulation.* 2005;112(3):332-40.
- Khashu H, Baifu CS, Bansal SR, Chillar A. Salivary biomarkers: a periodontal overview. *J Oral Health and Comm Dent.* 2012:6:28-33.
- Riaz S, Alam SS, Akhtar MW. Proteomic identification of human serum biomarkers in diabetes mellitus type 2. *J Pharm Biomed Anal.* 2010;51(5):1103-7.
